# Supplementary material for: Impact of CeO2 nanoparticles on the microbiota of the S. flos-cuculi L. (Caryophyllaceae) rhizosphere
Source: Royal Society of Chemistry journal article supplement (doi:10.1039/d3en00479a), 2024-01-01
Supplement: d3en00479a1.pdf [file d3en00479a1.pdf]

**Supplementary Materials:** The following supporting information can be downloaded at: [www.mdpi.com/xxx/s1](http://www.mdpi.com/xxx/s1),  
 Figure S1: title; Table S1: title; Video S1: title.

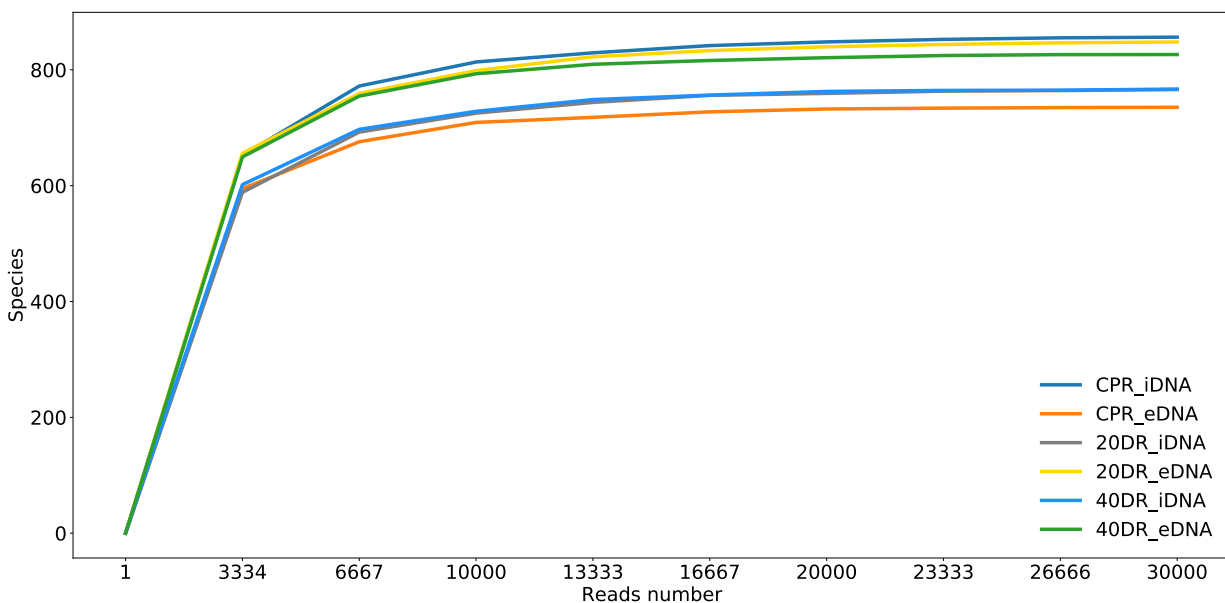

**Supplementary Figure 1:** Rarefaction curves.

**Supplementary Table 1:** Phylum level report of the High-Throughput Sequencing

| Taxonomy                         | CPRi   | CPRe   | 20DRi  | 20DRe  | 40DRi  | 40DRe  |
|----------------------------------|--------|--------|--------|--------|--------|--------|
| <i>Proteobacteria</i>            | 46.24% | 41.83% | 51.92% | 48.91% | 47.60% | 46.14% |
| <i>Gemmatimonadetes</i>          | 9.87%  | 10.01% | 10.87% | 8.26%  | 11.32% | 8.56%  |
| <i>Bacteroidetes</i>             | 10.27% | 10.38% | 10.77% | 8.31%  | 9.22%  | 8.63%  |
| <i>Chloroflexi</i>               | 5.29%  | 6.46%  | 5.84%  | 9.55%  | 6.97%  | 10.88% |
| <i>Acidobacteria</i>             | 6.58%  | 3.70%  | 8.85%  | 4.77%  | 9.40%  | 5.46%  |
| <i>Actinobacteria</i>            | 4.02%  | 4.09%  | 3.81%  | 8.68%  | 4.80%  | 8.11%  |
| <i>Verrucomicrobia</i>           | 4.83%  | 5.82%  | 2.91%  | 5.11%  | 4.99%  | 6.48%  |
| <i>Firmicutes</i>                | 7.58%  | 13.12% | 0.52%  | 0.96%  | 0.89%  | 1.24%  |
| <i>Patescibacteria</i>           | 1.48%  | 1.43%  | 0.83%  | 1.65%  | 1.04%  | 1.65%  |
| Taxa below 0.5%                  | 1.15%  | 0.79%  | 1.21%  | 1.14%  | 1.17%  | 0.81%  |
| Planctomycetes                   | 1.09%  | 0.92%  | 0.29%  | 1.17%  | 0.82%  | 0.81%  |
| Armatimonadetes                  | 0.60%  | 0.53%  | 0.77%  | 0.54%  | 0.97%  | 0.57%  |
| Cyanobacteria                    | 0.36%  | 0.40%  | 0.20%  | 0.58%  | 0.35%  | 0.42%  |
| uncultured soil bacterium<br>WS2 | 0.40%  | 0.10%  | 1.06%  | 0.19%  | 0.41%  | 0.14%  |
| Spirochaetes                     | 0.23%  | 0.43%  | 0.17%  | 0.18%  | 0.05%  | 0.12%  |

**Supplementary Table 2:** Genera level report of the High-Throughput Sequencing: OTUs detected in controls and do not in treated samples.

| OTUs                                |     |     | CPR_iDNA | CPR_eDNA | 20DR_iDNA | 20DR_eDNA | 40DR_iDNA | 40DR_eDNA |
|-------------------------------------|-----|-----|----------|----------|-----------|-----------|-----------|-----------|
| <i>Lutispora</i>                    | AN  | Gv  | 0,77%    | 1,34%    | 0,00%     | 0,00%     | 0,00%     | 0,00%     |
| <i>Eisenbergiella</i>               | AN  | Gv  | 0,36%    | 0,73%    | 0,00%     | 0,00%     | 0,00%     | 0,00%     |
| <i>Desulfotobacterium</i>           | sAN | +   | 0,36%    | 0,39%    | 0,00%     | 0,00%     | 0,00%     | 0,00%     |
| <i>Anaerovorax</i>                  | sAN | Gv  | 0,31%    | 0,34%    | 0,00%     | 0,00%     | 0,00%     | 0,00%     |
| <i>Anaerobacterium</i>              | AN  | +   | 0,24%    | 0,64%    | 0,00%     | 0,00%     | 0,00%     | 0,00%     |
| <i>Oxalobacter</i>                  | AN  | -   | 0,23%    | 0,25%    | 0,00%     | 0,00%     | 0,00%     | 0,00%     |
| <i>Veillonella</i>                  | AN  | -   | 0,22%    | 0,22%    | 0,00%     | 0,00%     | 0,00%     | 0,00%     |
| <i>Desulfovibrio</i>                | AN  | -   | 0,20%    | 0,17%    | 0,00%     | 0,00%     | 0,00%     | 0,00%     |
| <i>Clostridium sensu stricto 12</i> | AN  | +   | 0,19%    | 0,21%    | 0,00%     | 0,00%     | 0,00%     | 0,00%     |
| <i>Desulfotomaculum</i>             | AN  | +   | 0,12%    | 0,14%    | 0,00%     | 0,00%     | 0,00%     | 0,00%     |
| <i>Clostridium sensu stricto 3</i>  | AN  | +   | 0,12%    | 0,14%    | 0,00%     | 0,00%     | 0,00%     | 0,00%     |
| <i>Thermincola</i>                  | AN  | +   | 0,11%    | 0,11%    | 0,00%     | 0,00%     | 0,00%     | 0,00%     |
| <i>Clostridium sensu stricto 16</i> | AN  | +   | 0,09%    | 0,13%    | 0,00%     | 0,00%     | 0,00%     | 0,00%     |
| U. m. of Ruminococcaceae family     | sAN | +   | 0,09%    | 0,17%    | 0,00%     | 0,00%     | 0,00%     | 0,00%     |
| <i>Kaistia</i>                      | sAE | -   | 0,09%    | 0,17%    | 0,00%     | 0,00%     | 0,00%     | 0,00%     |
| U. m. of Clostridiales order        | AN  | +   | 0,07%    | 0,10%    | 0,00%     | 0,00%     | 0,00%     | 0,00%     |
| <i>Oxobacter</i>                    | AN  | +   | 0,06%    | 0,04%    | 0,00%     | 0,00%     | 0,00%     | 0,00%     |
| <i>Propioniceella</i>               | fAN | +   | 0,06%    | 0,07%    | 0,00%     | 0,00%     | 0,00%     | 0,00%     |
| <i>Niabella</i>                     | sAE | -   | 0,04%    | 0,06%    | 0,00%     | 0,00%     | 0,00%     | 0,00%     |
| U. m. of Christensenellaceae family | AN  | -   | 0,04%    | 0,04%    | 0,00%     | 0,00%     | 0,00%     | 0,00%     |
| <i>Haliscomenobacter</i>            | sAE | -   | 0,03%    | 0,04%    | 0,00%     | 0,00%     | 0,00%     | 0,00%     |
| <i>Niveispirillum</i>               | AE  | -   | 0,03%    | 0,07%    | 0,00%     | 0,00%     | 0,00%     | 0,00%     |
| <i>Propionivibrio</i>               | AN  | -   | 0,03%    | 0,02%    | 0,00%     | 0,00%     | 0,00%     | 0,00%     |
| <i>Sedimentibacter</i>              | sAN | +/- | 0,02%    | 0,06%    | 0,00%     | 0,00%     | 0,00%     | 0,00%     |
| <i>Dechloromonas</i>                | AN  | -   | 0,01%    | 0,02%    | 0,00%     | 0,00%     | 0,00%     | 0,00%     |

Gv: cells stained Gram-negative, the cell-wall ultrastructure resembles Gram-positive bacteria; +: gram stain positive; -: gram stain negative; +/-: Gram stain positive or negative. AE: aerobic; sAE: strict aerobic; AN: anaerobic; sAN: strict anaerobic; fAN: facultative anaerobic

**Supplementary Table 3: Plant Growth Promoting Rhizobacteria (PGPR) microorganisms**

|                           | Nitrogen fixation | Phytohormones production | Siderophore production | (ACC) deaminase | Phosphate solubilization | Overcoming environmental stress |                      |
|---------------------------|-------------------|--------------------------|------------------------|-----------------|--------------------------|---------------------------------|----------------------|
| <i>Acetobacter</i>        |                   |                          |                        |                 | +                        |                                 | [48, 66]             |
| <i>Advenella</i>          |                   | +                        | +                      |                 | +                        |                                 | [66]                 |
| <i>Allorhizobium</i>      | +                 |                          |                        |                 |                          |                                 | [68]                 |
| <i>Anabaena</i>           | +                 |                          |                        |                 |                          |                                 | [48]                 |
| <i>Arthrobacter</i>       |                   |                          |                        |                 | +                        |                                 | [66, 68]             |
| <i>Aulosira</i>           | +                 |                          |                        |                 |                          |                                 | [48]                 |
| <i>Azorhizobium</i>       | +                 |                          |                        |                 |                          |                                 | [65, 68]             |
| <i>Azospirillum</i>       | +                 | +                        | +                      |                 |                          | +                               | [69, 48, 65, 66, 68] |
| <i>Azotobacter</i>        | +                 | +                        |                        |                 |                          |                                 | [48, 65]             |
| <i>Bacillus</i>           | +                 | +                        |                        | +               | +                        | +                               | [69, 48, 66]         |
| <i>Bradyrhizobium</i>     | +                 | +                        |                        |                 |                          |                                 | [66]                 |
| <i>Burkholderia</i>       | +                 | +                        | +                      | +               | +                        |                                 | [65, 66]             |
| <i>Cedecea</i>            |                   |                          |                        |                 | +                        |                                 | [66]                 |
| <i>Cellulosimicrobium</i> |                   | +                        | +                      |                 | +                        |                                 | [72]                 |
| <i>Chryseobacterium</i>   |                   |                          | +                      |                 | +                        |                                 | [65, 66]             |
| <i>Citrobacter</i>        |                   |                          | +                      |                 |                          |                                 | [68]                 |
| <i>Cronobacter</i>        |                   |                          |                        |                 | +                        |                                 | [66]                 |
| <i>Delftia</i>            |                   |                          |                        |                 | +                        |                                 | [66]                 |
| <i>Enterobacter</i>       |                   | +                        |                        |                 | +                        |                                 | [66]                 |
| <i>Escherichia</i>        |                   | +                        |                        |                 |                          |                                 | [66]                 |
| <i>Flavobacterium</i>     |                   |                          |                        |                 | +                        |                                 | [68]                 |
| <i>Frankia</i>            | +                 |                          |                        |                 |                          |                                 | [66]                 |
| <i>Frateuria</i>          |                   |                          |                        |                 |                          | +                               | [69]                 |
| <i>Gluconacetobacter</i>  | +                 |                          |                        |                 |                          | +                               | [48, 66]             |
| <i>Gordonia</i>           |                   |                          |                        |                 | +                        |                                 | [66]                 |
| <i>Grimontella</i>        |                   | +                        | +                      |                 |                          |                                 | [66]                 |
| <i>Herbaspirillum</i>     | +                 |                          | +                      |                 | +                        |                                 | [66, 66]             |
| <i>Klebsiella</i>         |                   | +                        | +                      |                 | +                        |                                 | [66]                 |
| <i>Mesorhizobium</i>      | +                 |                          |                        |                 |                          |                                 | [66, 73]             |
| <i>Methylobacterium</i>   | +                 |                          |                        |                 |                          |                                 | [71]                 |
| <i>Micrococcus</i>        |                   |                          |                        |                 | +                        |                                 | [68]                 |
| <i>Mycobacterium</i>      |                   |                          |                        |                 |                          | +                               | [65]                 |
| <i>Nostoc</i>             | +                 |                          |                        |                 |                          |                                 | [48]                 |
| <i>Ochrobactrum</i>       |                   |                          |                        | +               |                          |                                 | [66]                 |
| <i>Paenibacillus</i>      |                   | +                        |                        |                 | +                        |                                 | [65, 66]             |
| <i>Pantoea</i>            | +                 | +                        |                        |                 | +                        |                                 | [66]                 |
| <i>Phosphobacter</i>      |                   |                          |                        |                 | +                        | +                               | [48]                 |
| <i>Phyllobacterium</i>    |                   |                          | +                      |                 | +                        |                                 | [65, 66]             |
| <i>Plectonema</i>         | +                 |                          |                        |                 |                          |                                 | [48]                 |
| <i>Pseudomonas</i>        |                   | +                        | +                      | +               | +                        | +                               | [48, 65, 66]         |
| <i>Rahnella</i>           |                   | +                        |                        |                 |                          |                                 | [66]                 |
| <i>Rhizobium</i>          | +                 | +                        | +                      | +               | +                        |                                 | [65, 70]             |
| <i>Rhodococcus</i>        |                   |                          |                        |                 | +                        |                                 | [66]                 |
| <i>Scytonema</i>          | +                 |                          |                        |                 |                          |                                 | [48]                 |
| <i>Serratia</i>           |                   |                          |                        |                 | +                        |                                 | [66]                 |
| <i>Sinorhizobium</i>      | +                 |                          |                        |                 |                          | +                               | [65]                 |
| <i>Stenotrophomonas</i>   |                   |                          | +                      |                 |                          | +                               | [48]                 |
| <i>Tetrathibacter</i>     |                   |                          |                        |                 | +                        |                                 | [66]                 |
| <i>Tolypothrix</i>        | +                 |                          |                        |                 |                          |                                 | [48]                 |

**Supplementary Table 4:** PGPR bacteria distribution detected in iDNA and eDNA. Treated samples OTUs abundance compared to controls. Bold and underlined show OTUs with higher and lower abundance, respectively

|                         | CPR_iDNA | 20DR_iDNA    | 40DR_iDNA    | CPR_eDNA | 20DR_eDNA    | 40DR_eDNA    |
|-------------------------|----------|--------------|--------------|----------|--------------|--------------|
| <i>Allorhizobium</i>    | 0,19%    | <u>0,15%</u> | 0,19%        | 0,22%    | <b>0,23%</b> | <u>0,20%</u> |
| <i>Azospirillum</i>     | 0,13%    | <u>0,00%</u> | <u>0,10%</u> | 0,29%    | <u>0,06%</u> | <u>0,23%</u> |
| <i>Pseudomonas</i>      | 0,30%    | <u>0,16%</u> | <u>0,08%</u> | 0,21%    | 0,21%        | <b>0,22%</b> |
| <i>Bacillus</i>         | 1,65%    | <u>0,07%</u> | <u>0,50%</u> | 4,24%    | <u>0,51%</u> | <u>0,73%</u> |
| <i>Bradyrhizobium</i>   | 0,00%    | 0,00%        | <b>0,20%</b> | 0,00%    | <b>0,21%</b> | <b>0,12%</b> |
| <i>Chryseobacterium</i> | 0,00%    | 0,00%        | <b>0,01%</b> | 0,00%    | <b>0,01%</b> | <b>0,01%</b> |
| <i>Enterobacter</i>     | 0,00%    | 0,00%        | <b>0,03%</b> | 0,00%    | 0,00%        | <b>0,04%</b> |
| <i>Mesorhizobium</i>    | 0,41%    | <u>0,37%</u> | <u>0,35%</u> | 0,35%    | <b>0,51%</b> | <u>0,33%</u> |
| <i>Paenibacillus</i>    | 0,00%    | <b>0,02%</b> | <b>0,02%</b> | 0,00%    | <b>0,03%</b> | <b>0,02%</b> |
| <i>Pantoea</i>          | 0,00%    | <b>0,02%</b> | <b>0,02%</b> | 0,00%    | <b>0,03%</b> | <b>0,02%</b> |
| <i>Pseudomonas</i>      | 0,30%    | <u>0,16%</u> | <u>0,08%</u> | 0,21%    | 0,21%        | <b>0,22%</b> |
| <i>Rhizobium</i>        | 0,19%    | <u>0,15%</u> | 0,19%        | 0,22%    | <b>0,23%</b> | <u>0,20%</u> |
| <i>Stenotrophomonas</i> | 0,02%    | <u>0,00%</u> | <u>0,00%</u> | 0,00%    | 0,00%        | 0,00%        |
